# Supplementary material
Source: HighWire-hosted journal article supplement (https://www.cmajopen.ca/highwire/filestream/80897/field_highwire_adjunct_files/3/open-2014-0006-04-at.pdf)
Supplement: open-2014-0006-04-at.pdf [file open-2014-0006-04-at.pdf]

**Appendix 4 (as supplied by the authors): Sensitivity and specificity for case definitions 1–4,\*  
by primary diagnosis of end-stage renal disease (diabetes or glomerulonephritis) over 5 years (2004–2008)**

**Appendix 4A: Sensitivity and specificity by diabetes diagnosis†**

| Diabetes | med_dialysis | mrp_dialysis | COUNT | PERCENT | Category    | rate  | L_normal | U_normal | Definition* |
|----------|--------------|--------------|-------|---------|-------------|-------|----------|----------|-------------|
| 0        | No           | No           | 4824  | 75.87   | Sensitivity | 87.08 | 85.08    | 89.09    | 1           |
|          | No           | Yes          | 139   | 2.19    | Specificity | 91.33 | 90.57    | 92.09    |             |
|          | Yes          | No           | 458   | 7.20    | PPV         | 67.17 | 64.70    | 69.63    |             |
|          | Yes          | Yes          | 937   | 14.74   | NPV         | 97.20 | 96.74    | 97.66    |             |
|          |              |              |       |         | Accuracy    | 90.61 | 89.80    | 91.42    |             |
|          |              |              |       |         | Kappa       | 0.70  | 0.68     | 0.72     |             |
| 1        | No           | No           | 2962  | 64.13   | Sensitivity | 88.08 | 86.37    | 89.79    | 1           |
|          | No           | Yes          | 164   | 3.55    | Specificity | 91.34 | 90.37    | 92.30    |             |
|          | Yes          | No           | 281   | 6.08    | PPV         | 81.18 | 79.20    | 83.16    |             |
|          | Yes          | Yes          | 1212  | 26.24   | NPV         | 94.75 | 93.97    | 95.54    |             |
|          |              |              |       |         | Accuracy    | 90.37 | 89.33    | 91.40    |             |
|          |              |              |       |         | Kappa       | 0.78  | 0.76     | 0.79     |             |
| 0        | No           | No           | 4938  | 77.67   | Sensitivity | 85.04 | 82.91    | 87.17    | 2           |
|          | No           | Yes          | 161   | 2.53    | Specificity | 93.49 | 92.82    | 94.15    |             |
|          | Yes          | No           | 344   | 5.41    | PPV         | 72.68 | 70.22    | 75.14    |             |
|          | Yes          | Yes          | 915   | 14.39   | NPV         | 96.84 | 96.36    | 97.32    |             |
|          |              |              |       |         | Accuracy    | 92.06 | 91.32    | 92.80    |             |
|          |              |              |       |         | Kappa       | 0.74  | 0.71     | 0.76     |             |
| 1        | No           | No           | 3023  | 65.45   | Sensitivity | 86.85 | 85.06    | 88.63    | 2           |
|          | No           | Yes          | 181   | 3.92    | Specificity | 93.22 | 92.35    | 94.08    |             |
|          | Yes          | No           | 220   | 4.76    | PPV         | 84.45 | 82.56    | 86.34    |             |
|          | Yes          | Yes          | 1195  | 25.87   | NPV         | 94.35 | 93.55    | 95.15    |             |
|          |              |              |       |         | Accuracy    | 91.32 | 90.34    | 92.29    |             |
|          |              |              |       |         | Kappa       | 0.79  | 0.78     | 0.81     |             |
| 0        | No           | No           | 5271  | 82.90   | Sensitivity | 68.96 | 66.19    | 71.72    | 3           |
|          | No           | Yes          | 334   | 5.25    | Specificity | 99.79 | 99.67    | 99.91    |             |
|          | Yes          | No           | 11    | 0.17    | PPV         | 98.54 | 97.68    | 99.40    |             |
|          | Yes          | Yes          | 742   | 11.67   | NPV         | 94.04 | 93.42    | 94.66    |             |
|          |              |              |       |         | Accuracy    | 94.57 | 93.98    | 95.17    |             |
|          |              |              |       |         | Kappa       | 0.78  | 0.76     | 0.80     |             |
| 1        | No           | No           | 3224  | 69.80   | Sensitivity | 74.42 | 72.11    | 76.72    | 3           |
|          | No           | Yes          | 352   | 7.62    | Specificity | 99.41 | 99.15    | 99.68    |             |
|          | Yes          | No           | 19    | 0.41    | PPV         | 98.18 | 97.37    | 98.99    |             |
|          | Yes          | Yes          | 1024  | 22.17   | NPV         | 90.16 | 89.18    | 91.13    |             |
|          |              |              |       |         | Accuracy    | 91.97 | 91.08    | 92.86    |             |
|          |              |              |       |         | Kappa       | 0.79  | 0.77     | 0.81     |             |
| 0        | No           | No           | 5274  | 82.95   | Sensitivity | 49.26 | 46.27    | 52.24    | 4           |
|          | No           | Yes          | 546   | 8.59    | Specificity | 99.85 | 99.74    | 99.95    |             |
|          | Yes          | No           | 8     | 0.13    | PPV         | 98.51 | 97.49    | 99.54    |             |
|          | Yes          | Yes          | 530   | 8.34    | NPV         | 90.62 | 89.87    | 91.37    |             |
|          |              |              |       |         | Accuracy    | 91.29 | 90.56    | 92.01    |             |
|          |              |              |       |         | Kappa       | 0.61  | 0.58     | 0.64     |             |
| 1        | No           | No           | 3231  | 69.95   | Sensitivity | 46.29 | 43.66    | 48.93    | 4           |
|          | No           | Yes          | 739   | 16.00   | Specificity | 99.63 | 99.42    | 99.84    |             |
|          | Yes          | No           | 12    | 0.26    | PPV         | 98.15 | 97.11    | 99.19    |             |
|          | Yes          | Yes          | 637   | 13.79   | NPV         | 81.39 | 80.17    | 82.60    |             |
|          |              |              |       |         | Accuracy    | 83.74 | 82.59    | 84.89    |             |
|          |              |              |       |         | Kappa       | 0.54  | 0.51     | 0.57     |             |

\*Case definitions: 1 = Any ONE outpatient dialysis claim; 2 = Any TWO outpatient dialysis claims; 3 = Any TWO outpatient dialysis claims >90 days apart; 4= Any TWO outpatient dialysis claims >90 days apart (no gaps >21 days).

†Diabetes definition: ICD-9 code 250, ICD-10 codes E10–E14. A person was defined with diabetes if they had an ICD code/claim for diabetes from 1984 until day of dialysis claim and then 2 ICD codes/claims for diabetes within 2 years from 1984 until end of their admin data.

**Appendix 4B: Sensitivity and specificity by nephritis diagnosis†**

| Nephritis | med_dialysis | mrp_dialysis | COUNT | PERCENT | Category    | rate  | L_normal | U_normal | Definition* |
|-----------|--------------|--------------|-------|---------|-------------|-------|----------|----------|-------------|
| 0         | No           | No           | 7242  | 72.33   | Sensitivity | 86.73 | 85.27    | 88.19    | 1           |
|           | No           | Yes          | 274   | 2.74    | Specificity | 91.12 | 90.49    | 91.74    |             |
|           | Yes          | No           | 706   | 7.05    | PPV         | 71.73 | 69.96    | 73.49    |             |
|           | Yes          | Yes          | 1791  | 17.89   | NPV         | 96.35 | 95.93    | 96.78    |             |
|           |              |              |       |         | Accuracy    | 90.21 | 89.54    | 90.88    |             |
|           |              |              |       |         | Kappa       | 0.72  | 0.71     | 0.74     |             |
| 1         | No           | No           | 544   | 56.43   | Sensitivity | 92.51 | 89.88    | 95.13    | 1           |
|           | No           | Yes          | 29    | 3.01    | Specificity | 94.28 | 92.39    | 96.18    |             |
|           | Yes          | No           | 33    | 3.42    | PPV         | 91.56 | 88.80    | 94.32    |             |
|           | Yes          | Yes          | 358   | 37.14   | NPV         | 94.94 | 93.14    | 96.73    |             |
|           |              |              |       |         | Accuracy    | 93.57 | 91.56    | 95.58    |             |
|           |              |              |       |         | Kappa       | 0.87  | 0.83     | 0.90     |             |
| 0         | No           | No           | 7409  | 73.99   | Sensitivity | 85.33 | 83.80    | 86.85    | 2           |
|           | No           | Yes          | 303   | 3.03    | Specificity | 93.22 | 92.67    | 93.77    |             |
|           | Yes          | No           | 539   | 5.38    | PPV         | 76.58 | 74.84    | 78.31    |             |
|           | Yes          | Yes          | 1762  | 17.60   | NPV         | 96.07 | 95.64    | 96.50    |             |
|           |              |              |       |         | Accuracy    | 91.59 | 90.97    | 92.21    |             |
|           |              |              |       |         | Kappa       | 0.75  | 0.74     | 0.77     |             |
| 1         | No           | No           | 552   | 57.26   | Sensitivity | 89.92 | 86.92    | 92.92    | 2           |
|           | No           | Yes          | 39    | 4.05    | Specificity | 95.67 | 94.01    | 97.33    |             |
|           | Yes          | No           | 25    | 2.59    | PPV         | 93.30 | 90.76    | 95.84    |             |
|           | Yes          | Yes          | 348   | 36.10   | NPV         | 93.40 | 91.40    | 95.40    |             |
|           |              |              |       |         | Accuracy    | 93.36 | 91.35    | 95.37    |             |
|           |              |              |       |         | Kappa       | 0.86  | 0.83     | 0.89     |             |
| 0         | No           | No           | 7925  | 79.15   | Sensitivity | 70.65 | 68.69    | 72.62    | 3           |
|           | No           | Yes          | 606   | 6.05    | Specificity | 99.71 | 99.59    | 99.83    |             |
|           | Yes          | No           | 23    | 0.23    | PPV         | 98.45 | 97.82    | 99.08    |             |
|           | Yes          | Yes          | 1459  | 14.57   | NPV         | 92.90 | 92.35    | 93.44    |             |
|           |              |              |       |         | Accuracy    | 93.72 | 93.20    | 94.23    |             |
|           |              |              |       |         | Kappa       | 0.79  | 0.77     | 0.80     |             |
| 1         | No           | No           | 570   | 59.13   | Sensitivity | 79.33 | 75.29    | 83.36    | 3           |
|           | No           | Yes          | 80    | 8.30    | Specificity | 98.79 | 97.89    | 99.68    |             |
|           | Yes          | No           | 7     | 0.73    | PPV         | 97.77 | 96.14    | 99.40    |             |
|           | Yes          | Yes          | 307   | 31.85   | NPV         | 87.69 | 85.17    | 90.22    |             |
|           |              |              |       |         | Accuracy    | 90.98 | 88.77    | 93.18    |             |
|           |              |              |       |         | Kappa       | 0.81  | 0.77     | 0.84     |             |
| 0         | No           | No           | 7934  | 79.24   | Sensitivity | 46.78 | 44.63    | 48.93    | 4           |
|           | No           | Yes          | 1099  | 10.98   | Specificity | 99.82 | 99.73    | 99.92    |             |
|           | Yes          | No           | 14    | 0.14    | PPV         | 98.57 | 97.83    | 99.31    |             |
|           | Yes          | Yes          | 966   | 9.65    | NPV         | 87.83 | 87.16    | 88.51    |             |
|           |              |              |       |         | Accuracy    | 88.88 | 88.24    | 89.53    |             |
|           |              |              |       |         | Kappa       | 0.58  | 0.56     | 0.60     |             |
| 1         | No           | No           | 571   | 59.23   | Sensitivity | 51.94 | 46.96    | 56.92    | 4           |
|           | No           | Yes          | 186   | 19.29   | Specificity | 98.96 | 98.13    | 99.79    |             |
|           | Yes          | No           | 6     | 0.62    | PPV         | 97.10 | 94.82    | 99.39    |             |
|           | Yes          | Yes          | 201   | 20.85   | NPV         | 75.43 | 72.36    | 78.50    |             |
|           |              |              |       |         | Accuracy    | 80.08 | 77.24    | 82.93    |             |
|           |              |              |       |         | Kappa       | 0.55  | 0.50     | 0.60     |             |

\*Case definitions: 1 = Any ONE outpatient dialysis claim; 2 = Any TWO outpatient dialysis claims; 3 = Any TWO outpatient dialysis claims >90 days apart; 4= Any TWO outpatient dialysis claims >90 days apart (no gaps >21 days).

†Nephritis definition: ICD-9 codes 583, 583.0, 583.1, 583.2, 583.4, 583.9, 583.81, 583.89; ICD-10 codes N00–N08. A person was defined with nephritis if they had an ICD code/claim for nephritis from 1984 until day of dialysis claim.
